# Supplementary material for: Association Between Prenatal Exposure to Metals and Atopic Dermatitis Among Children Aged 4 Years in Taiwan
Source: PubMed Central journal article supplement (PMC8552055; doi:10.1001/jamanetworkopen.2021.31327), 2021-10-27
Supplement: jamanetwopen-e2131327-s001.pdf [file jamanetwopen-e2131327-s001.pdf]

## Supplementary Online Content

Tsai TL, Wang SL, Hsieh CJ, et al; TMICS Study Group. Association between prenatal exposure to metals and atopic dermatitis among children aged 4 years in Taiwan. *JAMA Netw Open*. 2021;4(10):e2131327. doi:10.1001/jamanetworkopen.2021.31327

**eTable 1.** Baseline Characteristics of Children Included, Unavailable for Follow-up, and Excluded

**eTable 2.** Spearman Correlation Coefficients for Total Arsenic, Total Inorganic Arsenic, and Estimated Total Inorganic Arsenic in Maternal Urine During Pregnancy in Previous TMICS Pilot Study With Arsenic Data Available

**eTable 3.** Characteristics of Children in Birth Cohort Classified by Geographic Area

**eTable 4.** Logistic Regression Analysis of Association Between Prenatal Exposure to Metals and Atopic Dermatitis in Children

**eTable 5.** Logistic Regression Analysis of Association Between Prenatal Exposure to Metals and Atopic Dermatitis in Children With Further Adjustment for Metals

**eTable 6.** Logistic Regression Analysis of Association Between Prenatal Exposure to Metals and Atopic Dermatitis in Children Without Categorization by Creatinine Urinary Levels

**eFigure 1.** Correlation Matrix of Maternal Urinary Metal Concentrations

**eFigure 2.** Directed Acyclic Graph of Confounding Variables

This supplementary material has been provided by the authors to give readers additional information about their work.

**eTable 1.** Baseline Characteristics of Children Included, Unavailable for Follow-up, and Excluded (N = 1152)

|                                                  |                    | Lost to follow-up or Excluded (n=782) |               | Included (n=370) |               | p-value |
|--------------------------------------------------|--------------------|---------------------------------------|---------------|------------------|---------------|---------|
|                                                  |                    | n (%)                                 |               | n (%)            |               |         |
| Geographic area                                  | Central            | 485 (62.02)                           |               | 267 (72.16)      |               | < 0.01  |
|                                                  | Eastern            | 297 (37.98)                           |               | 103 (27.84)      |               |         |
| Sex                                              | Boy                | 297 (50.94)                           |               | 208 (56.22)      |               | 0.11    |
|                                                  | Girl               | 286 (49.06)                           |               | 162 (43.78)      |               |         |
| Maternal education (yrs)                         | ≤ 12               | 95 (16.64)                            |               | 47 (12.70)       |               | 0.01    |
|                                                  | 13–16              | 411 (71.98)                           |               | 258 (69.73)      |               |         |
|                                                  | > 16               | 65 (11.38)                            |               | 65 (17.57)       |               |         |
| Income per year (USD)                            | < 32420            | 359 (67.99)                           |               | 173 (48.60)      |               | < 0.01  |
|                                                  | 32420–47763        | 148 (28.03)                           |               | 104 (29.21)      |               |         |
|                                                  | > 47763            | 21 (3.98)                             |               | 79 (22.19)       |               |         |
| ETS exposure at pregnancy                        | Yes                | 256 (44.91)                           |               | 130 (39.88)      |               | 0.14    |
|                                                  | No                 | 314 (55.09)                           |               | 196 (60.12)      |               |         |
| Maternal allergies                               | Yes                | 135 (24.11)                           |               | 172 (46.49)      |               | < 0.01  |
|                                                  | No                 | 425 (75.89)                           |               | 198 (53.51)      |               |         |
|                                                  |                    | Mean ± SD                             |               | Mean ± SD        |               |         |
| Age                                              |                    | 3.71 ± 0.64                           |               | 3.94 ± 0.59      |               | < 0.01  |
| Birth weight (g)                                 |                    | 3080 ± 449.3                          |               | 3126 ± 383.4     |               | 0.11    |
| Maternal age                                     |                    | 31.52 ± 5.09                          |               | 32.52 ± 4.04     |               | < 0.01  |
| Gestational weeks                                |                    | 38.41 ± 1.63                          |               | 38.68 ± 1.14     |               | 0.04    |
|                                                  |                    | Median (IQR)                          | Mean ± SD     | Median (IQR)     | Mean ± SD     |         |
| Umaternal metal levels (µg·g cre <sup>-1</sup> ) | As                 | 50.27 (50.87)                         | 69.93 ± 70.20 | 53.72 (53.03)    | 80.28 ± 108.7 | 0.07    |
|                                                  | eΣiAs <sup>§</sup> | 28.64 (7.37)                          | 31.48 ± 10.17 | 29.14 (7.69)     | 32.98 ± 15.76 | 0.07    |
|                                                  | Cd                 | 0.80 (0.51)                           | 0.98 ± 0.81   | 0.81 (0.64)      | 1.05 ± 1.02   | 0.32    |
|                                                  | Pb                 | 1.31 (0.85)                           | 1.48 ± 1.10   | 1.35 (0.78)      | 1.90 ± 5.27   | 0.29    |
|                                                  | Co                 | 1.27 (1.00)                           | 1.60 ± 1.33   | 1.33 (1.30)      | 1.61 ± 1.12   | 0.24    |
|                                                  | Cu                 | 18.63 (8.84)                          | 20.77 ± 10.63 | 17.44 (7.48)     | 19.52 ± 11.83 | < 0.01  |
|                                                  | Ni                 | 3.98 (4.00)                           | 6.16 ± 11.90  | 3.95 (3.97)      | 6.67 ± 12.51  | 0.85    |
|                                                  | Tl                 | 0.31 (0.17)                           | 0.33 ± 0.16   | 0.29 (0.16)      | 0.33 ± 0.22   | 0.56    |
|                                                  | Zn                 | 439.3 (337.2)                         | 498.4 ± 311.4 | 453.6 (322.8)    | 528.4 ± 355.5 | 0.14    |

<sup>§</sup> eΣiAs (estimated total inorganic arsenic) = 21.35241 + 0.14493\*(As)

**eTable 2.** Spearman Correlation Coefficients for Total Arsenic, Total Inorganic Arsenic, and Estimated Total Inorganic Arsenic in Maternal Urine During Pregnancy in Previous TMICS Pilot Study With Arsenic Data Available (N = 336)

| Species<br>( $\mu\text{g}\cdot\text{g}^{-1}$ ) | As | $\Sigma\text{iAs}$ | $\text{e}\Sigma\text{iAs}^{\S}$ |
|------------------------------------------------|----|--------------------|---------------------------------|
| As                                             | 1  | 0.61               | 1.00                            |
|                                                |    | < 0.01             | < 0.01                          |
| $\Sigma\text{iAs}$                             |    | 1                  | 0.61                            |
|                                                |    |                    | < 0.01                          |
| $\text{e}\Sigma\text{iAs}^{\S}$                |    |                    | 1                               |
|                                                |    |                    |                                 |

$\Sigma\text{iAs}$  (total inorganic arsenic) = As(III) + As(V) + MMA + DMA

$\text{e}\Sigma\text{iAs}$  (estimated total inorganic arsenic) =  $21.35241 + 0.14493 \cdot (\text{As})$

The concentration of  $\Sigma\text{iAs}$  (median: 32.80; IQR: 22.50)

The concentration of  $\text{e}\Sigma\text{iAs}$  (median: 34.08; IQR: 13.68)

**eTable 3.** Characteristics of Children in Birth Cohort Classified by Geographic Area

|                                                              |                    | Central (n=267) |               | Eastern (n=103) |               | p-value |
|--------------------------------------------------------------|--------------------|-----------------|---------------|-----------------|---------------|---------|
|                                                              |                    | n (%)           |               | n (%)           |               |         |
| Sex                                                          | Boy                | 156 (58.43)     |               | 52 (50.49)      |               | 0.17    |
|                                                              | Girl               | 111 (41.57)     |               | 51 (49.51)      |               |         |
| Maternal education (yrs)                                     | ≤ 12               | 29 (10.86)      |               | 18 (17.48)      |               | 0.15    |
|                                                              | 13–16              | 193 (72.28)     |               | 65 (63.11)      |               |         |
|                                                              | > 16               | 45 (16.85)      |               | 20 (19.42)      |               |         |
| Income per year (USD)                                        | < 32420            | 115 (45.10)     |               | 58 (57.43)      |               | 0.01    |
|                                                              | 32420–47763        | 73 (28.63)      |               | 31 (30.69)      |               |         |
|                                                              | > 47763            | 67 (26.27)      |               | 12 (11.88)      |               |         |
| ETS exposure at pregnancy                                    | Yes                | 88 (38.43)      |               | 42 (43.30)      |               | 0.46    |
|                                                              | No                 | 141 (61.57)     |               | 55 (56.70)      |               |         |
| ETS exposure at 4 yrs                                        | Yes                | 47 (17.60)      |               | 29 (28.16)      |               | 0.02    |
|                                                              | No                 | 220 (82.40)     |               | 74 (71.84)      |               |         |
| Paternal allergies                                           | Yes                | 93 (47.21)      |               | 32 (50.00)      |               | 0.70    |
|                                                              | No                 | 104 (52.79)     |               | 32 (50.00)      |               |         |
| Maternal allergies                                           | Yes                | 127 (47.57)     |               | 45 (43.69)      |               | 0.50    |
|                                                              | No                 | 140 (52.43)     |               | 58 (56.31)      |               |         |
| Parental allergies                                           | Yes                | 170 (63.67)     |               | 58 (56.31)      |               | 0.19    |
|                                                              | No                 | 97 (36.33)      |               | 45 (43.69)      |               |         |
| AD                                                           | Yes                | 79 (29.59)      |               | 31 (30.10)      |               | 0.92    |
|                                                              |                    | Mean ± SD       |               | Mean ± SD       |               |         |
| Age                                                          |                    | 4.02 ± 0.61     |               | 3.74 ± 0.49     |               | < 0.01  |
| Birth weight (g)                                             |                    | 3128 ± 383.0    |               | 3123 ± 386.6    |               | 0.92    |
| Maternal age                                                 |                    | 32.62 ± 3.99    |               | 32.35 ± 4.15    |               | 0.61    |
| Gestational weeks                                            |                    | 38.46 ± 0.11    |               | 39.01 ± 1.11    |               | < 0.01  |
|                                                              |                    | Median (IQR)    | Mean ± SD     | Median (IQR)    | Mean ± SD     |         |
| U <sub>maternal</sub> metal levels (µg·g cre <sup>-1</sup> ) | As                 | 57.30 (51.28)   | 81.75 ± 119.7 | 48.94 (68.36)   | 76.47 ± 7.38  | 0.39    |
|                                                              | eΣiAs <sup>§</sup> | 29.66 (7.43)    | 33.20 ± 17.35 | 28.45 (9.91)    | 32.44 ± 10.63 | 0.39    |
|                                                              | Cd                 | 0.92 (0.71)     | 1.18 ± 1.13   | 0.61 (0.33)     | 0.71 ± 0.52   | < 0.01  |
|                                                              | Pb                 | 1.44 (0.75)     | 1.87 ± 3.58   | 1.11 (0.67)     | 2.02 ± 8.19   | < 0.01  |
|                                                              | Co                 | 1.37 (1.31)     | 1.63 ± 1.15   | 1.29 (1.24)     | 1.55 ± 1.05   | 0.50    |
|                                                              | Cu                 | 17.33 (6.96)    | 19.67 ± 12.21 | 18.33 (8.43)    | 19.14 ± 10.82 | 0.83    |
|                                                              | Ni                 | 4.09 (4.87)     | 7.68 ± 14.52  | 3.60 (3.08)     | 4.03 ± 2.49   | 0.03    |
|                                                              | Tl                 | 0.30 (0.16)     | 0.34 ± 0.24   | 0.29 (0.17)     | 0.31 ± 0.13   | 0.18    |
|                                                              | Zn                 | 468.5 (316.9)   | 554.2 ± 376.2 | 389.3 (307.7)   | 461.7 ± 286.5 | < 0.01  |

<sup>§</sup> eΣiAs (estimated total inorganic arsenic) = 21.35241 + 0.14493\*(As)

**eTable 4.** Logistic Regression Analysis of Association Between Prenatal Exposure to Metals and Atopic Dermatitis in Children (N = 370)

|                                                            | Model 1           |         |         | Model 2           |         |         |
|------------------------------------------------------------|-------------------|---------|---------|-------------------|---------|---------|
| U <sub>maternal metal levels (µg·g cre<sup>-1</sup>)</sub> | OR (95%CI)        | p-value | q value | OR (95%CI)        | p-value | q value |
| As                                                         | 1.41 (1.15, 1.74) | < 0.01  | 0.01    | 1.49 (1.20, 1.85) | < 0.01  | < 0.01  |
| eΣiAs <sup>§</sup>                                         | 2.14 (1.23, 3.73) | 0.01    | 0.02    | 2.36 (1.33, 4.19) | < 0.01  | 0.01    |
| Cd                                                         | 1.04 (0.80, 1.36) | 0.74    | 0.98    | 1.02 (0.76, 1.36) | 0.90    | 0.90    |
| Pb                                                         | 1.05 (0.80, 1.37) | 0.74    | 0.97    | 1.06 (0.79, 1.41) | 0.72    | 0.72    |
| Co                                                         | 0.99 (0.79, 1.25) | 0.93    | 0.98    | 1.11 (0.83, 1.47) | 0.49    | 0.51    |
| Cu                                                         | 1.01 (0.69, 1.45) | 0.98    | 0.98    | 1.00 (0.67, 1.50) | 0.99    | 0.99    |
| Ni                                                         | 0.91 (0.79, 1.06) | 0.23    | 0.47    | 0.88 (0.74, 1.04) | 0.14    | 0.21    |
| Tl                                                         | 1.03 (0.72, 1.48) | 0.86    | 0.98    | 1.04 (0.70, 1.53) | 0.86    | 0.86    |
| Zn                                                         | 0.94 (0.72, 1.24) | 0.66    | 0.98    | 0.83 (0.62, 1.12) | 0.23    | 0.28    |

Model 1: Adjustment for child's sex (boy or girl), geographic area (central or eastern) according to DAG

Model 2: Adjustment for propensity score for each exposure. It was calculated from child's sex (boy or girl), ETS exposure at 4 years of age (yes or no), maternal education (≤ 12 yrs, 13–16 yrs, > 16 yrs), parental allergies (yes or no), geographic area (central or eastern), exposure to other metals (the studied metal did not include)

<sup>§</sup> eΣiAs (estimated total inorganic arsenic) = 21.35241 + 0.14493\*(As)

The concentrations of metals were log<sub>2</sub>-transformed

**eTable 5.** Logistic Regression Analysis of Association Between Prenatal Exposure to Metals and Atopic Dermatitis in Children With Further Adjustment for Metals (N = 370)

|                                                                  | Model 1           |                | Model 1           |                | Model 2           |                | Model 2           |                |
|------------------------------------------------------------------|-------------------|----------------|-------------------|----------------|-------------------|----------------|-------------------|----------------|
| <b>U<sub>maternal</sub> metal levels (µg·g cre<sup>-1</sup>)</b> | <b>OR (95%CI)</b> | <b>p-value</b> | <b>OR (95%CI)</b> | <b>p-value</b> | <b>OR (95%CI)</b> | <b>p-value</b> | <b>OR (95%CI)</b> | <b>p-value</b> |
| As                                                               | 1.48 (1.19, 1.84) | < 0.01         | —                 |                | 1.47 (1.18, 1.84) | < 0.01         | —                 |                |
| eΣiAs <sup>§</sup>                                               | —                 |                | 2.34 (1.31, 4.19) | < 0.01         | —                 |                | 2.28 (1.27, 4.09) | 0.01           |
| Cd                                                               | 1.01 (0.74, 1.37) | 0.97           | 1.02 (0.75, 1.39) | 0.89           | 1.02 (0.75, 1.40) | 0.90           | 1.03 (0.76, 1.41) | 0.83           |
| Pb                                                               | 1.01 (0.74, 1.39) | 0.94           | 1.03 (0.75, 1.40) | 0.88           | 1.03 (0.74, 1.43) | 0.86           | 1.04 (0.76, 1.44) | 0.79           |
| Co                                                               | 1.07 (0.81, 1.43) | 0.62           | 1.08 (0.81, 1.43) | 0.60           | 1.07 (0.80, 1.43) | 0.63           | 1.08 (0.81, 1.44) | 0.61           |
| Cu                                                               | 1.06 (0.68, 1.66) | 0.78           | 1.06 (0.68, 1.64) | 0.21           | 1.12 (0.71, 1.78) | 0.62           | 1.12 (0.71, 1.77) | 0.62           |
| Ni                                                               | 0.87 (0.73, 1.04) | 0.12           | 0.87 (0.73, 1.03) | 0.11           | 0.86 (0.72, 1.03) | 0.10           | 0.86 (0.72, 1.03) | 0.10           |
| Tl                                                               | 0.92 (0.61, 1.40) | 0.70           | 0.94 (0.62, 1.42) | 0.77           | 0.87 (0.56, 1.34) | 0.52           | 0.89 (0.58, 1.36) | 0.58           |
| Zn                                                               | 0.84 (0.62, 1.14) | 0.26           | 0.87 (0.64, 1.17) | 0.35           | 0.80 (0.58, 1.10) | 0.17           | 0.83 (0.60, 1.13) | 0.23           |

<sup>§</sup> eΣiAs (estimated total inorganic arsenic) = 21.35241 + 0.14493\*(As)

Model 1: Adjustment for child's sex (boy or girl), geographic area (central or eastern) according to DAG; all metals in the model

Model 2: Adjustment for child's sex (boy or girl), parental allergies (yes or no), geographic area (central or eastern), ETS exposure at 4 years of age (yes or no); all metals in the model

The concentrations of metals were log<sub>2</sub>-transformed

**eTable 6.** Logistic Regression Analysis of Association Between Prenatal Exposure to Metals and Atopic Dermatitis in Children Without Categorization by Creatinine Urinary Levels (N = 370)

| U <sub>maternal</sub> metal levels (µg/L) | Model 1           |         |         | Model 2           |         |         |
|-------------------------------------------|-------------------|---------|---------|-------------------|---------|---------|
|                                           | OR (95%CI)        | p-value | q value | OR (95%CI)        | p-value | q value |
| As                                        | 1.32 (1.12, 1.56) | < 0.01  | 0.01    | 1.32 (1.11, 1.57) | < 0.01  | 0.01    |
| eΣiAs <sup>§</sup>                        | 2.25 (1.25, 4.05) | 0.01    | 0.03    | 2.22 (1.23, 4.02) | 0.01    | 0.04    |
| Cd                                        | 1.08 (0.91, 1.30) | 0.38    | 0.63    | 1.10 (0.91, 1.32) | 0.32    | 0.55    |
| Pb                                        | 1.12 (0.91, 1.38) | 0.30    | 0.63    | 1.14 (0.92, 1.41) | 0.24    | 0.55    |
| Co                                        | 1.06 (0.88, 1.27) | 0.54    | 0.63    | 1.07 (0.89, 1.29) | 0.50    | 0.64    |
| Cu                                        | 1.08 (0.88, 1.31) | 0.46    | 0.63    | 1.09 (0.90, 1.34) | 0.36    | 0.55    |
| Ni                                        | 0.96 (0.84, 1.10) | 0.56    | 0.63    | 0.97 (0.84, 1.10) | 0.60    | 0.67    |
| Tl                                        | 1.11 (0.89, 1.38) | 0.36    | 0.63    | 1.11 (0.89, 1.39) | 0.37    | 0.55    |
| Zn                                        | 1.04 (0.86, 1.25) | 0.69    | 0.69    | 1.04 (0.86, 1.26) | 0.71    | 0.71    |

<sup>§</sup> eΣiAs (estimated total inorganic arsenic) = 15.065 + 0.122\*(As)

Model 1: Adjustment for child's sex (boy or girl), geographic area (central or eastern) according to DAG; U<sub>maternal</sub> metal levels without urinary creatinine correction

Model 2: Adjustment for child's sex (boy or girl), parental allergies (yes or no), geographic area (central or eastern), ETS exposure at 4 years of age (yes or no); U<sub>maternal</sub> metal levels without urinary creatinine correction

The concentrations of metals were log<sub>2</sub>-transformed

**eFigure 1.** Correlation Matrix of Maternal Urinary Metal Concentrations

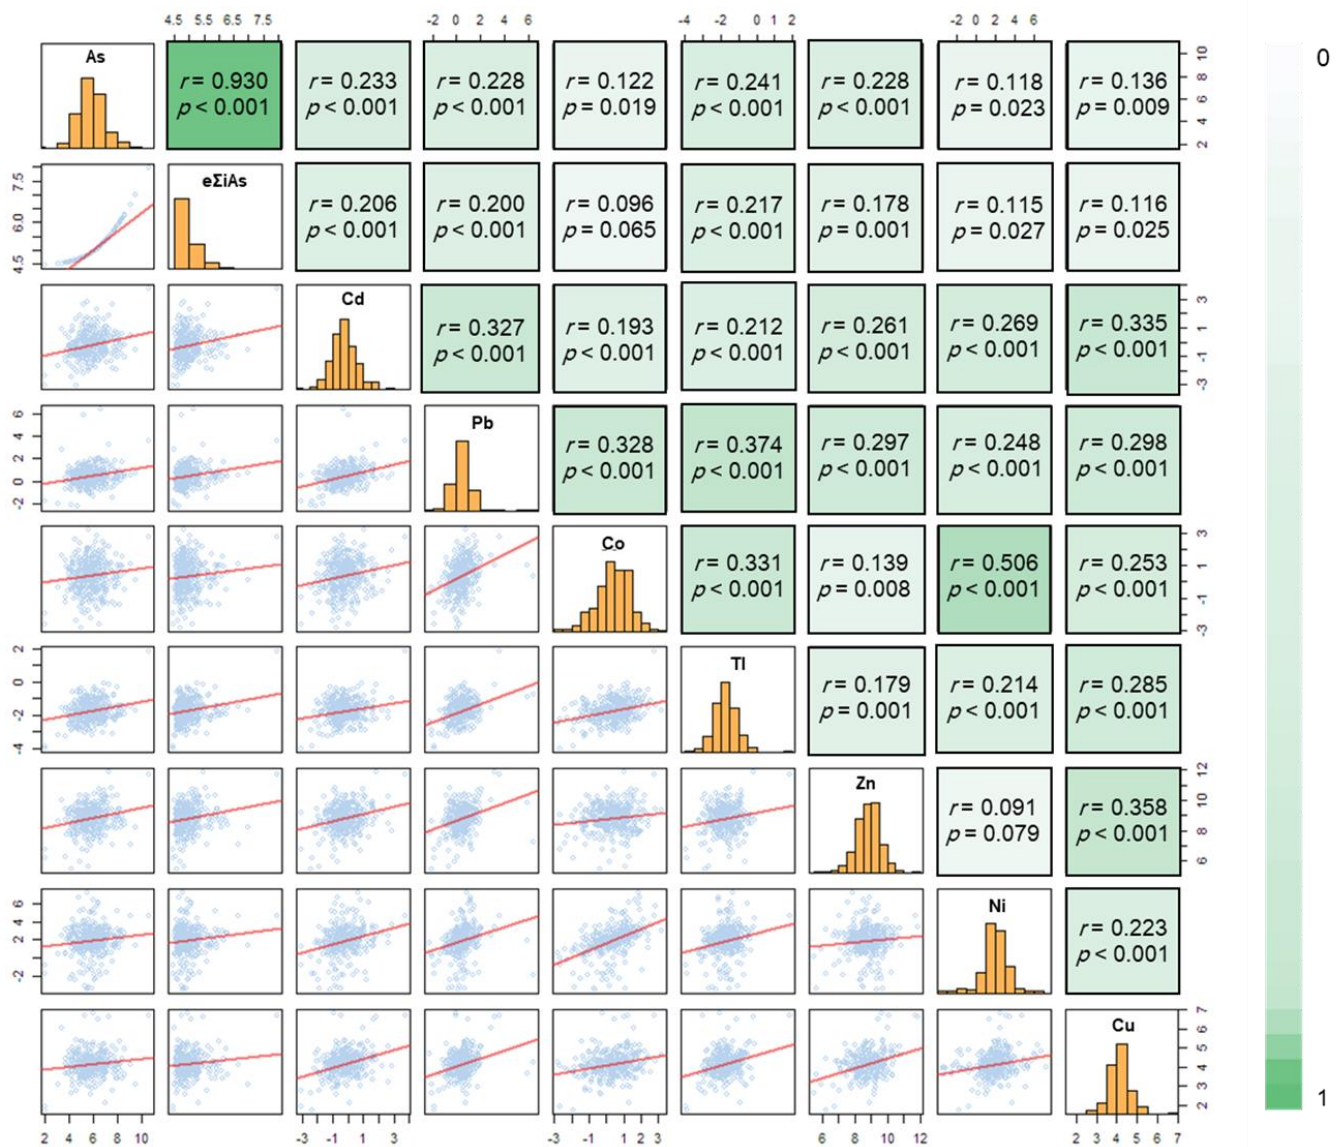

Metal concentrations measured by  $\mu\text{g}\cdot\text{g cre}^{-1}$ .  $e\Sigma\text{iAs}$  (estimated total inorganic arsenic) =  $21.35241 + 0.14493^*(\text{As})$ . The concentrations of metals were  $\log_2$ -transformed for normality.



**eFigure 2.** Directed Acyclic Graph of Confounding Variables

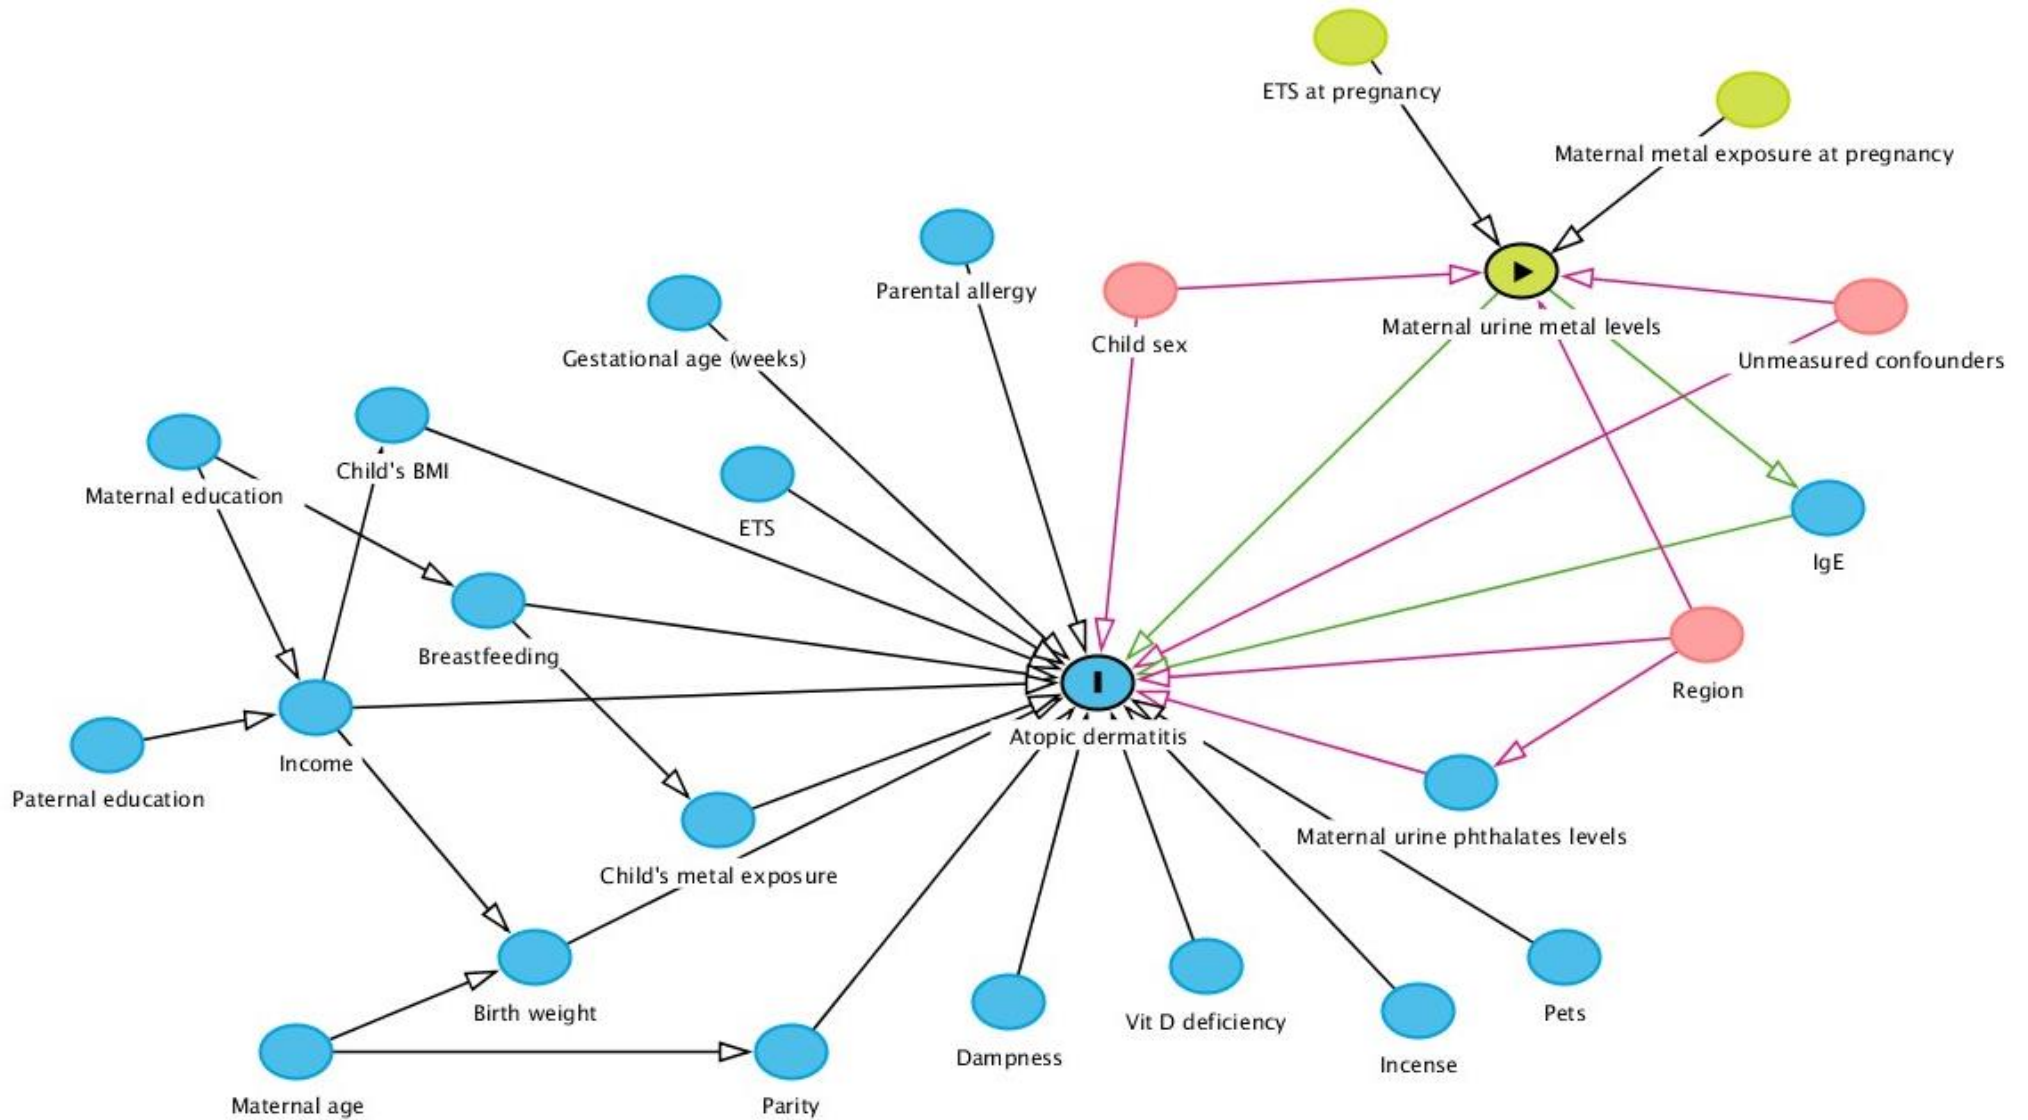

Red oval: confounding factor; blue oval: other factors; green oval: ancestor of exposure; green oval with solid triangle: exposure; blue oval with vertical bar: outcome.
