# Supplementary material for: Association Between Prenatal Exposure to Metals and Atopic Dermatitis Among Children Aged 4 Years in Taiwan
Source: PubMed Central journal article supplement (PMC8552055; doi:10.1001/jamanetworkopen.2021.31327), 2021-10-27
Supplement: jamanetwopen-e2131327-s002.pdf [file jamanetwopen-e2131327-s002.pdf]

\*Indicates required information. Only first name, last name, and suffix will appear in PubMed.

| <b>*Group Name(s): TMICS Study Group</b> |                   |                              |                  |                                    |                                          |                                                         |                                                                                            |
|------------------------------------------|-------------------|------------------------------|------------------|------------------------------------|------------------------------------------|---------------------------------------------------------|--------------------------------------------------------------------------------------------|
| <b>*First Name and Middle Initial(s)</b> | <b>*Last Name</b> | <b>*Suffix (eg, Jr, III)</b> | Academic Degrees | Institution                        | Location (city, state/province, country) | Role or Contribution, eg, chair, principal investigator | Group (if more than 1 Group listed in the byline) and/or Subgroup (eg, Steering Committee) |
| Ying- Chih                               | Tseng             |                              | MD               | Hsinchu Cathay General Hospital    | Hsinchu, Taiwan                          | Cooperative physician; subject recruitments             | TMICS-Central area                                                                         |
| Chaw-Liang                               | Chang             |                              | MD               | Hsinchu Cathay General Hospital    | Hsinchu, Taiwan                          | Cooperative physician; subject recruitments             | TMICS-Central area                                                                         |
| Tsung-Ho                                 | Ying              |                              | MD               | Chung Shan Medical University Hosp | Taichung, Taiwan                         | Cooperative physician; subject recruitments             | TMICS-Central area                                                                         |
| Pen-Hua                                  | Su                |                              | MD               | Chung Shan Medical University Hosp | Taichung, Taiwan                         | Cooperative physician; subject recruitments             | TMICS-Central area                                                                         |
| Kuei-Cheng                               | Hsu               |                              | MD               | Changhua Christian Hospital        | Changhua, Taiwan                         | Cooperative physician; subject recruitments             | TMICS-Central area                                                                         |
| Hsiao-Neng                               | Chen              |                              | MD               | Changhua Christian Hospital        | Changhua, Taiwan                         | Cooperative physician; subject recruitments             | TMICS-Central area                                                                         |
| Jian-Wun                                 | Cian              |                              | MD               | Changhua Christian Hospital        | Changhua, Taiwan                         | Cooperative physician; subject recruitments             | TMICS-Central area                                                                         |
| Wei-Te                                   | Lei               |                              | MD               | Hsinchu Mackay Memorial Hospital   | Hsinchu, Taiwan                          | Cooperative physician; subject recruitments             | TMICS-Central area                                                                         |
| Sheng-Po                                 | Kao               |                              | MD               | Buddhist Tzu Chi General Hospital  | Hualien, Taiwan                          | Cooperative physician; subject recruitments             | TMICS-Eastern area                                                                         |

## Supplemental Online Content: Nonauthor Collaborators

\*Indicates required information. Only first name, last name, and suffix will appear in PubMed.

| <b>*First Name and Middle Initial(s)</b> | <b>*Last Name</b> | <b>*Suffix (eg, Jr, III)</b> | Academic Degrees | Institution                       | Location (city, state/province, country) | Role or Contribution, eg, chair, principal investigator | Group (if more than 1 Group listed in the byline) and/or Subgroup (eg, Steering Committee) |
|------------------------------------------|-------------------|------------------------------|------------------|-----------------------------------|------------------------------------------|---------------------------------------------------------|--------------------------------------------------------------------------------------------|
| Yu-Chi                                   | Wei               |                              | MD               | Buddhist Tzu Chi General Hospital | Hualien, Taiwan                          | Cooperative physician; subject recruitments             | TMICS-Eastern area                                                                         |
| Yu-Hsun                                  | Chang             |                              | MD               | Buddhist Tzu Chi General Hospital | Hualien, Taiwan                          | Cooperative physician; subject recruitments             | TMICS-Eastern area                                                                         |
| Fu-Chen                                  | Kuo               |                              | MD               | E-Da Hospital                     | Kaohsiung, Taiwan                        | Cooperative physician; subject recruitments             | TMICS-Southern area                                                                        |
| Chien-Yi                                 | Wu                |                              | MD               | E-Da Hospital                     | Kaohsiung, Taiwan                        | Cooperative physician; subject recruitments             | TMICS-Southern area                                                                        |
